# Supplementary material
Source: ML conference proceedings conference paper supplement (https://openaccess.thecvf.com/content/CVPR2021/html/Fu_Unsupervised_Pre-Training_for_CVPR_2021_paper.html)
Supplement: Supplementary file 1 [file Fu_Unsupervised_Pre-Training_for_CVPR_2021_supplemental.pdf]

# Unsupervised Pre-training for Person Re-identification

In this supplementary material, we will provide results of pre-training on the existing dataset and share more detailed results for our “small-scale” and “few-shot” experiments.

## 1. Pre-training on existing dataset

In this section, we conduct unsupervised pre-training with existing person Re-ID datasets. Specifically, we use all the training images in **CUHK03**, **Market1501**, **DukeMTMC** and **MSMT17** and refer it as **CMDM** to train MoCoV2, Table 1 shows the details of the training images. We use  $[0.3256, 0.3058, 0.3162]$ ,  $[0.2603, 0.2489, 0.2391]$  as mean and std, which are calculated from all these training images. As there are only 69447 images, the default setting  $queue\_size = 65536$  in MoCoV2 is not suitable anymore for generating negative pairs, because this may lead to too many false negative samples. We try different  $queue\_size \in \{2048, 4096, 8192, 16384\}$  and find  $queue\_size = 4096$  is a good choice. We use the same data augmentation and temperature described in the main text.

| Item    | CUHK03 | Market1501 | DukeMTMC | MSMT17 | total |
|---------|--------|------------|----------|--------|-------|
| #ids    | 767    | 751        | 702      | 1041   | 3261  |
| #images | 7368   | 12936      | 16522    | 32621  | 69447 |

Table 1: The details of training images we used for pre-training on existing dataset.

Table 2 shows the performance comparison for using model pre-trained on “CMDM”. It can be seen that, “CMDM unsup.” model is less competitive than ImageNet supervised model, and is much weaker than our model which is pre-trained on LUPerson. This further proves the effectiveness and necessity of our LUPerson dataset.

## 2. More results for small-scale and few-shot

As introduced in the main text, we introduce two new settings: small-scale and few-shot, where the target dataset has limited annotated samples. Supplemented to Table 6 in the main text, we provide all the details and the left results in Table 3.

Table 3 shows that our model can always perform better than ImageNet pre-trained models, and the advantage is more obvious when the training data is less, which is very

| pre-train   | CUHK03    | Market1501 | DukeMTMC  | MSMT17    |
|-------------|-----------|------------|-----------|-----------|
| IN sup.     | 70.5/71.2 | 87.5/95.1  | 79.4/89.0 | 63.7/85.1 |
| CMDM unsup. | 51.7/52.7 | 81.4/92.8  | 74.4/84.8 | 48.7/72.6 |
| LUP unsup.  | 74.7/75.4 | 91.0/96.4  | 82.1/91.0 | 65.7/85.5 |

Table 2: Performance comparison for using different pre-trained models on MGN baseline. “CMDM unsup.” and “LUP unsup.” refer to unsupervised pre-trained model on CMDM and LUPerson, “IN sup.” refers to supervised pre-trained model on ImageNet. The first number is  $mAP$  and the second is  $cmcl$ .

meaningful for person Re-ID in practical application.

| scale      | 10%       | 20%       | 30%       | 40%       | 50%       | 60%       | 70%       | 80%       | 90%       | 100%      |
|------------|-----------|-----------|-----------|-----------|-----------|-----------|-----------|-----------|-----------|-----------|
| #id        | 75        | 150       | 225       | 300       | 375       | 450       | 525       | 600       | 675       | 751       |
| #images    | 1,170     | 2,643     | 3,962     | 5,226     | 6,408     | 7,814     | 9,120     | 11,417    | 11,727    | 12,936    |
| IN sup.    | 53.1/76.9 | 67.7/86.8 | 75.2/90.8 | 79.1/92.5 | 81.5/93.5 | 81.5/93.5 | 84.8/94.5 | 85.9/95.2 | 86.9/95.2 | 87.5/95.1 |
| IN unsup.  | 58.4/81.7 | 70.2/89.1 | 76.6/91.9 | 80.0/93.0 | 82.0/94.1 | 83.7/94.3 | 85.4/94.5 | 86.4/95.0 | 87.4/95.5 | 88.2/95.3 |
| LUP unsup. | 64.6/85.5 | 76.9/92.1 | 81.9/93.7 | 84.1/94.4 | 85.8/94.9 | 87.8/95.8 | 88.8/95.9 | 89.8/96.2 | 90.5/96.4 | 91.0/96.4 |

(a) Market1501 small-scale

| scale      | 10%       | 20%       | 30%       | 40%       | 50%       | 60%       | 70%       | 80%       | 90%       | 100%      |
|------------|-----------|-----------|-----------|-----------|-----------|-----------|-----------|-----------|-----------|-----------|
| #id        | 751       | 751       | 751       | 751       | 751       | 751       | 751       | 751       | 751       | 751       |
| #images    | 1,293     | 2,587     | 3,880     | 5,174     | 6,468     | 7,758     | 9,055     | 10,348    | 11,642    | 12,936    |
| IN sup.    | 21.1/41.8 | 53.2/75.1 | 68.1/87.6 | 75.4/90.4 | 80.2/92.8 | 83.0/93.6 | 84.2/94.0 | 86.3/94.7 | 86.7/94.6 | 87.5/95.1 |
| IN unsup.  | 18.6/36.1 | 56.5/77.5 | 69.3/87.8 | 78.8/88.3 | 78.3/90.9 | 81.7/93.3 | 84.4/94.1 | 86.4/95.0 | 87.1/95.2 | 88.2/95.3 |
| LUP unsup. | 26.4/47.5 | 63.5/83.0 | 78.3/92.1 | 80.3/92.7 | 84.2/93.9 | 86.7/94.7 | 88.4/95.5 | 89.8/96.0 | 90.4/96.3 | 91.0/96.4 |

(b) Market1501 few-shot

| scale      | 10%       | 20%       | 30%       | 40%       | 50%       | 60%       | 70%       | 80%       | 90%       | 100%      |
|------------|-----------|-----------|-----------|-----------|-----------|-----------|-----------|-----------|-----------|-----------|
| #id        | 70        | 140       | 210       | 280       | 351       | 421       | 491       | 561       | 631       | 702       |
| #images    | 1,670     | 3,192     | 5,530     | 6,924     | 8,723     | 10,197    | 11,939    | 13,500    | 15,111    | 16,522    |
| IN sup.    | 45.1/65.3 | 58.3/75.4 | 64.7/80.2 | 68.5/83.0 | 71.8/84.6 | 74.1/85.6 | 75.5/86.8 | 76.8/87.3 | 78.0/88.3 | 79.4/89.0 |
| IN unsup.  | 48.1/66.9 | 60.6/76.6 | 65.8/80.2 | 69.5/82.9 | 72.5/84.4 | 75.0/86.2 | 76.3/86.9 | 77.4/87.3 | 78.5/88.7 | 79.5/89.1 |
| LUP unsup. | 53.5/72.0 | 65.0/78.9 | 69.4/81.9 | 72.8/84.7 | 75.6/86.7 | 77.6/87.1 | 78.9/88.2 | 80.2/89.2 | 81.1/90.0 | 82.1/91.0 |

(c) DukeMTMC small-scale

| scale      | 10%       | 20%       | 30%       | 40%       | 50%       | 60%       | 70%       | 80%       | 90%       | 100%      |
|------------|-----------|-----------|-----------|-----------|-----------|-----------|-----------|-----------|-----------|-----------|
| #id        | 702       | 702       | 702       | 702       | 702       | 702       | 702       | 702       | 702       | 702       |
| #images    | 1,679     | 3,321     | 4,938     | 6,599     | 8,278     | 9,923     | 11,564    | 13,201    | 14,860    | 16,522    |
| IN sup.    | 31.5/47.1 | 56.2/72.1 | 65.4/79.8 | 71.0/83.9 | 73.9/85.7 | 75.8/86.6 | 77.2/87.8 | 78.3/88.6 | 79.1/88.8 | 79.4/89.0 |
| IN unsup.  | 32.4/48.0 | 56.4/72.2 | 65.3/80.2 | 70.2/83.4 | 73.7/85.1 | 75.8/86.7 | 77.7/88.2 | 78.7/88.7 | 79.4/89.0 | 79.5/89.1 |
| LUP unsup. | 35.8/50.2 | 61.0/74.9 | 72.3/83.8 | 75.2/86.8 | 77.7/87.4 | 79.4/88.4 | 80.8/89.2 | 81.7/90.3 | 82.0/90.6 | 82.1/91.0 |

(d) DukeMTMC few-shot

| scale      | 10%       | 20%       | 30%       | 40%       | 50%       | 60%       | 70%       | 80%       | 90%       | 100%      |
|------------|-----------|-----------|-----------|-----------|-----------|-----------|-----------|-----------|-----------|-----------|
| #id        | 104       | 208       | 312       | 416       | 520       | 624       | 728       | 832       | 936       | 1,041     |
| #images    | 3,659     | 6,471     | 9,787     | 13,006    | 15,917    | 19,672    | 22,680    | 26,335    | 29,529    | 32,621    |
| IN sup.    | 23.2/50.2 | 34.6/64.0 | 41.9/70.8 | 46.7/74.5 | 50.3/76.9 | 53.9/79.4 | 56.9/81.2 | 59.6/82.4 | 61.9/84.2 | 63.7/85.1 |
| IN unsup.  | 22.6/48.8 | 32.7/60.9 | 40.4/68.7 | 45.1/72.2 | 49.0/75.0 | 52.7/78.0 | 55.7/79.9 | 58.6/82.0 | 60.9/83.0 | 62.7/84.3 |
| LUP unsup. | 25.5/51.1 | 36.0/62.6 | 44.6/71.4 | 49.2/74.9 | 53.0/77.7 | 56.4/79.7 | 59.5/81.8 | 61.9/83.6 | 63.7/85.0 | 65.7/85.5 |

(e) MSMT17 small-scale

| scale      | 10%       | 20%       | 30%       | 40%       | 50%       | 60%       | 70%       | 80%       | 90%       | 100%      |
|------------|-----------|-----------|-----------|-----------|-----------|-----------|-----------|-----------|-----------|-----------|
| #id        | 1,041     | 1,041     | 1,041     | 1,041     | 1,041     | 1,041     | 1,041     | 1,041     | 1,041     | 1,041     |
| #images    | 3,262     | 6,524     | 9,786     | 13,048    | 16,310    | 19,572    | 22,834    | 26,096    | 29,358    | 32,621    |
| IN sup.    | 14.7/34.1 | 35.6/61.4 | 44.5/71.1 | 52.0/76.9 | 56.2/79.5 | 58.8/81.7 | 60.9/82.8 | 62.5/84.2 | 63.4/84.5 | 63.7/85.1 |
| IN unsup.  | 13.2/29.2 | 33.5/58.6 | 41.4/67.1 | 47.7/72.7 | 53.3/77.6 | 56.5/79.6 | 59.1/81.5 | 60.9/82.3 | 62.4/83.8 | 62.7/84.3 |
| LUP unsup. | 17.0/36.0 | 37.4/61.4 | 49.0/73.6 | 53.9/78.5 | 57.4/80.5 | 60.0/82.1 | 62.9/83.5 | 64.2/84.5 | 65.0/85.1 | 65.7/85.5 |

(f) MSMT17 few-shot

Table 3: Performance for small-scale and few-shot setting with MGN method for Market1501, DukeMTMC and MSMT17. “IN sup.” and “IN unsup.” refer to supervised and unsupervised pre-trained model on ImageNet, “LUP unsup.” refers to unsupervised pre-trained model on LUPerson. The first number is *mAP* and second is *cmcl*.
